# Supplementary material for: MicroRNA-638 inhibits cell proliferation, invasion and regulates cell cycle by targeting tetraspanin 1 in human colorectal carcinoma
Source: PubMed Central journal article supplement (PMC4322991; doi:10.18632/oncotarget.2499), 2014-10-07
Supplement: oncotarget-05-12083-s002.pdf [file oncotarget-05-12083-s002.pdf]

SUPPLEMENTARY FIGURES AND TABLES

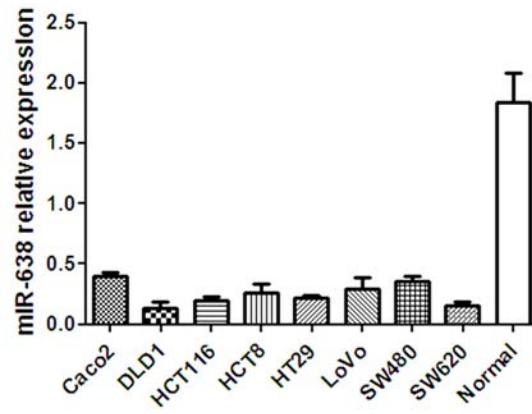

**Supplementary Figure S1: The expression of miR-638 in CRC cell lines.** Five samples of normal colon epithelium mucosae were pooled and subjected to quantitation of miR-638 expression (Normal).

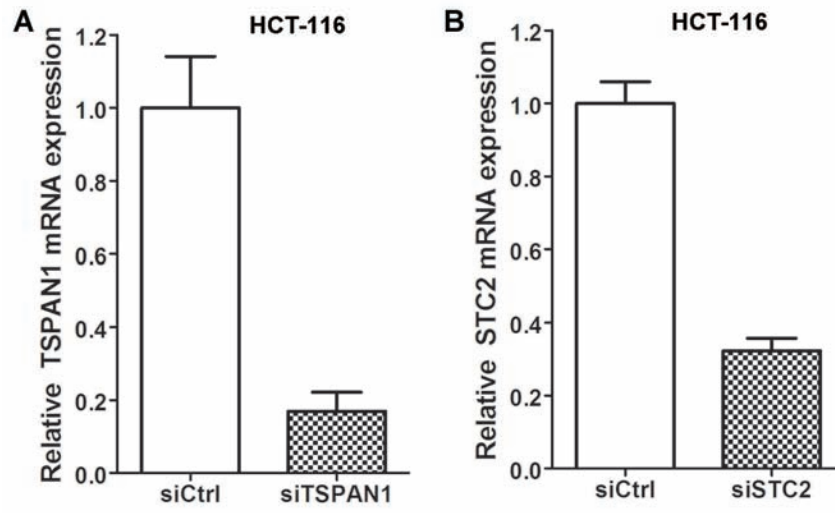

Supplementary Figure S2: Knockdown of TSPAN1 (A) and STC2 (B) using TSPAN1- or STC2- specific siRNAs in HCT-116 cells.

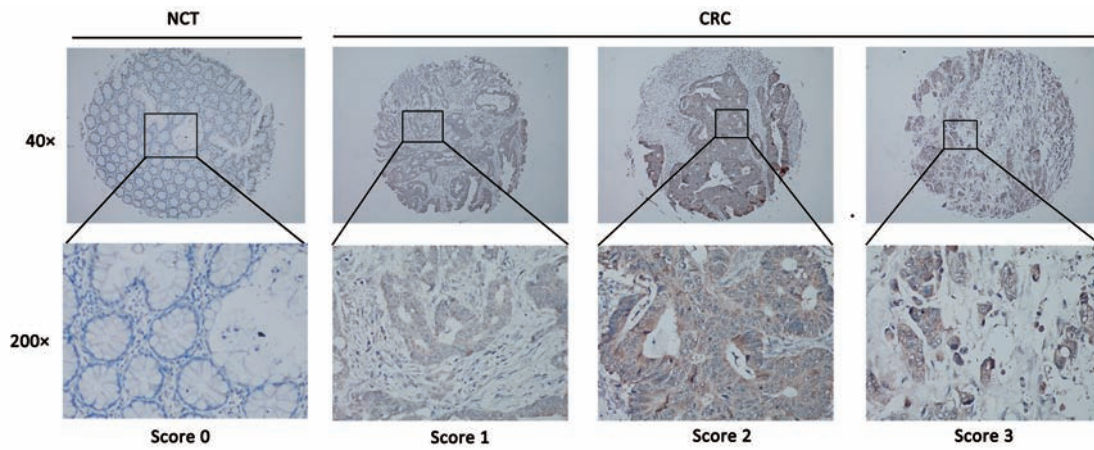

**Supplementary Figure S3: Immunohistochemical staining of TSPAN1 in the CRC and NCT samples.** TSPAN1 protein is mainly localized in the cytoplasm. The scores (0, 1, 2 and 3) are based on the intensity of the brown staining.

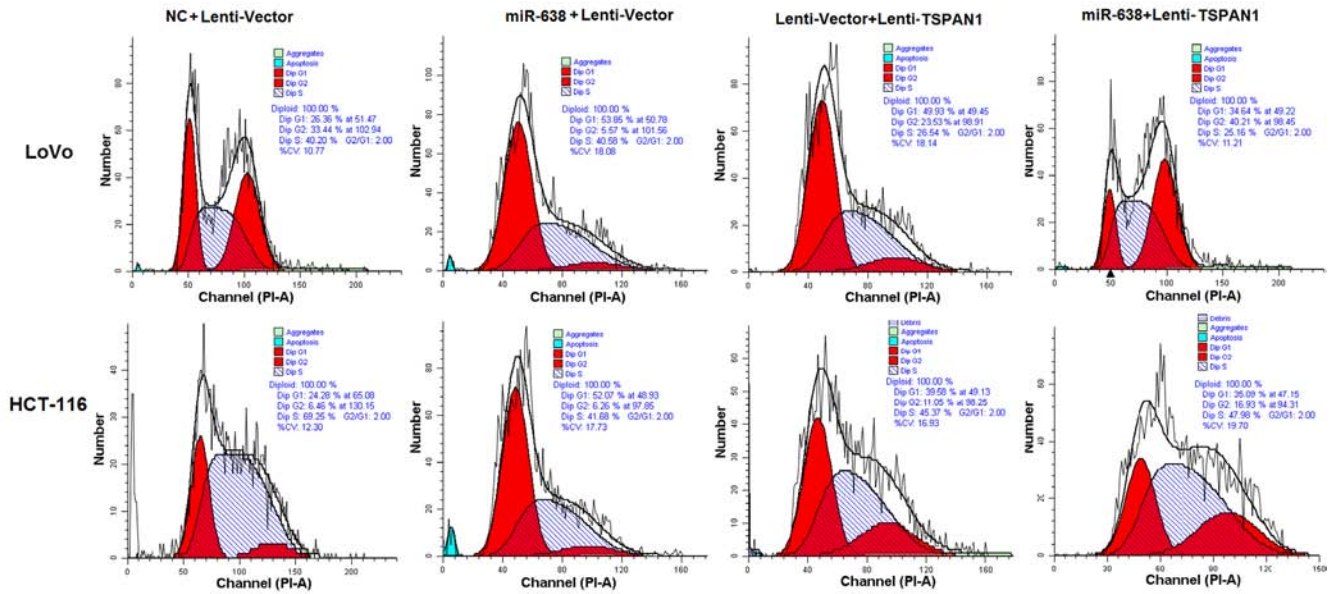

**Supplementary Figure S4: Representative graphs of cell cycle analysis.** Cell cycle analyses were performed in LoVo and HCT-116 cells transfected with miR-638, TSPAN1(ORF without 3'UTR) or vector control.

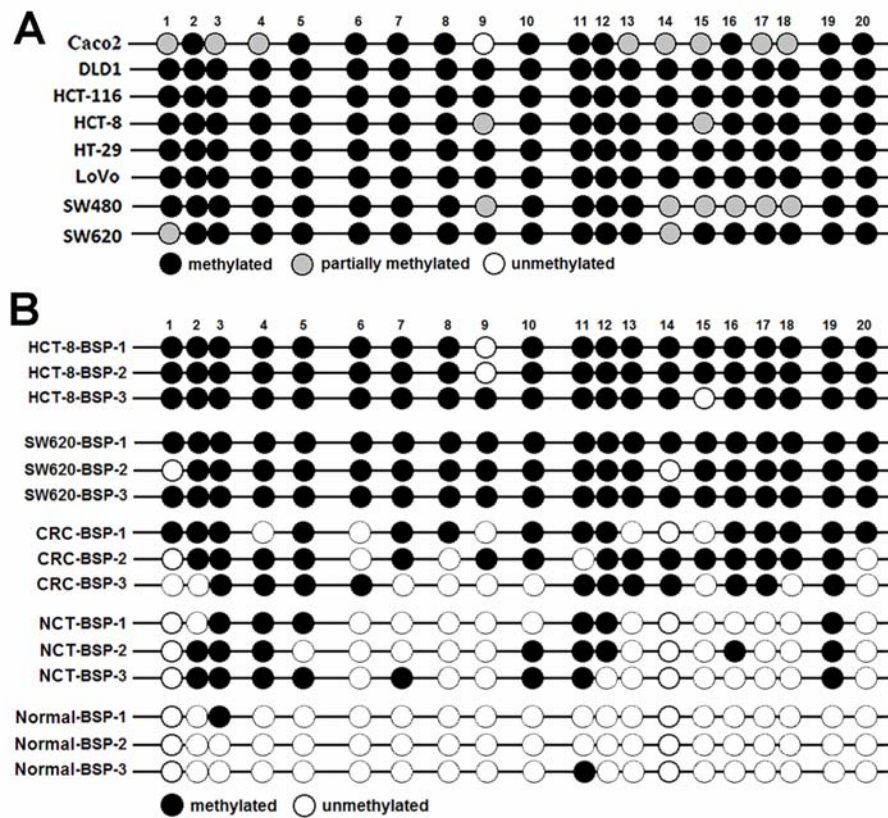

**Supplementary Figure S5: Representative results of bisulfite-sequencing PCR (BSP).** (A) Schematic representation of the methylation status of the CpG island (including 20 CpG sites) as detected in the indicated CRC cell lines. (B) Three positive clones were selected from T-A cloning of BSP products from CRC cells (HCT-8, SW480) or clinical tissue samples (CRC, NCT or normal colonic epithelia) and subjected to sequencing.

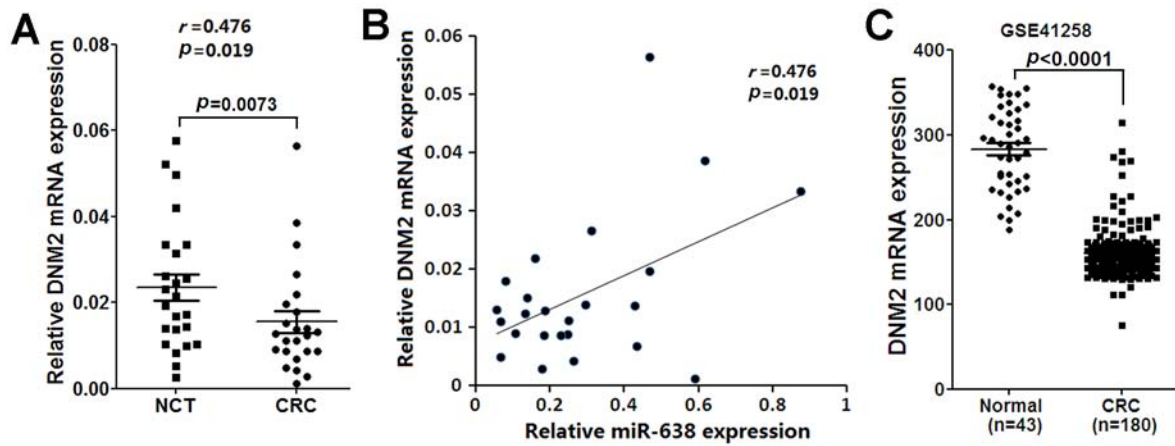

**Supplementary Figure S6: DNM2 mRNA expression is downregulated in CRC.** (A) DNM2 mRNA expression was detected by qRT-PCR in 24 paired CRC and adjacent noncancerous tissues (NCTs). (B) Relative DNM2 mRNA expression was positively correlated with miR-638 expression in CRC tissues. (C) DNM2 mRNA expression was downregulated in CRC compared with NCT in a test cohort. The data of DNM2 mRNA expression was obtained from a published CRC microarray data set (GSE41258).

**Supplementary Table S2. Patients' information**

| Characteristics         | Colorectal cancer* (n=146) | Colorectal cancer# (n=113) | Colorectal cancer <sup>§</sup> (n=103) |
|-------------------------|----------------------------|----------------------------|----------------------------------------|
| <b>Gender</b>           |                            |                            |                                        |
| Male                    | 83                         | 68                         | 61                                     |
| Female                  | 63                         | 45                         | 42                                     |
| <b>Age at diagnosis</b> |                            |                            |                                        |
| ≥58                     | 76                         | 65                         | 60                                     |
| <58                     | 70                         | 48                         | 43                                     |
| <b>TNM stage</b>        |                            |                            |                                        |
| I                       | 20                         | 17                         | 16                                     |
| II                      | 45                         | 32                         | 29                                     |
| III                     | 61                         | 50                         | 45                                     |
| IV                      | 20                         | 14                         | 13                                     |
| <b>Nodal status</b>     |                            |                            |                                        |
| Positive                | 79                         | 62                         | 56                                     |
| Negative                | 67                         | 51                         | 47                                     |
| <b>Tumor size (cm)</b>  |                            |                            |                                        |
| <5                      | 87                         | 66                         | 60                                     |
| ≥5                      | 59                         | 47                         | 43                                     |
| <b>Tumor location</b>   |                            |                            |                                        |
| Rectum                  | 62                         | 50                         | 42                                     |
| Distal colon            | 38                         | 30                         | 28                                     |
| Proximal colon          | 46                         | 33                         | 33                                     |
| <b>Grading</b>          |                            |                            |                                        |
| G1                      | 6                          | 4                          | 4                                      |
| G2                      | 114                        | 88                         | 79                                     |
| G3                      | 26                         | 21                         | 20                                     |

\*These cases were subjected to the detection of TSPAN1 protein.

#These cases were subjected to the detection of miR-638 expression.

§Both the miR-638 and TSPAN1 expression data were available in 103 cases.
